# Supplementary material for: Tailoring the defects of sub-100 nm multipodal titanium nitride/oxynitride nanotubes for efficient water splitting performance
Source: Royal Society of Chemistry journal article supplement (doi:10.1039/d1na00274k), 2021-01-01
Supplement: d1na00274k1.pdf [file d1na00274k1.pdf]

## Supporting information

### Tailoring the Defects of Sub-100 nm Multipodal Titanium Nitride/Oxynitride Nanotubes for Efficient Water Splitting Performance<sup>†</sup>

Kamel Eid<sup>a\*</sup> ‡, Mostafa H. Sliem<sup>b ‡</sup>, and Aboubakr M. Abdullah<sup>b\*</sup>

<sup>a</sup> Gas Processing Center, College of Engineering, Qatar University, Doha P.O. Box 2713, Qatar

<sup>b</sup> Center for advanced materials, Qatar University, Doha P.O. Box 2713, Qatar.

‡ Contributed equally to this work

\*Corresponding authors: kamel.eid@qu.edu.qa; bakr@qu.edu.qa

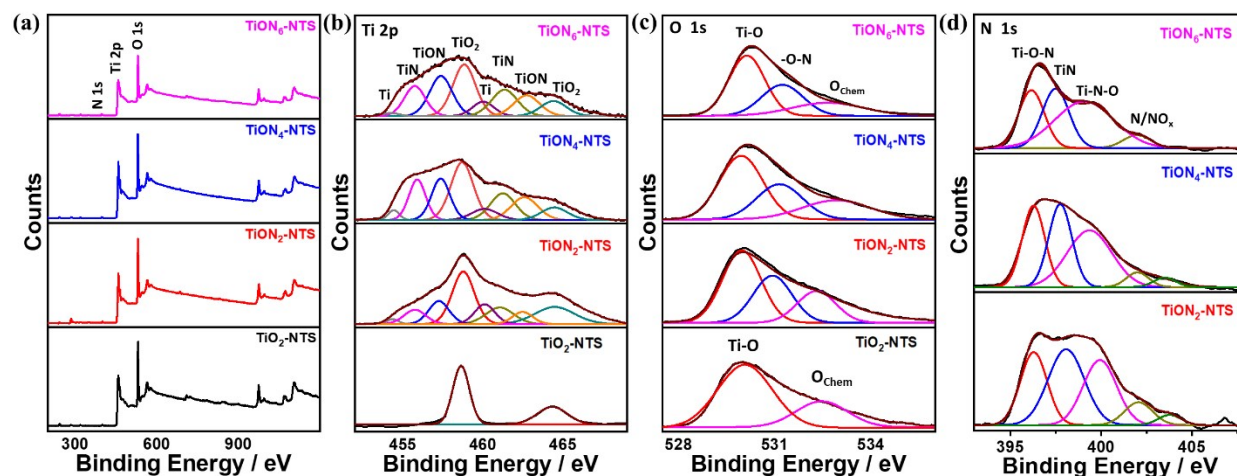

**Figure S1.** (a) XPS surveys of the as-synthesized materials and their high-resolution XPS spectra of (b) Ti 2p, (c) O 1s, (d) N1s of TiO<sub>2</sub>NTs and TiO<sub>x</sub>NTs after etching.

**Table S1.** The binding energies of Ti, O, and N as well as the N-content in the as-synthesized materials. The unit for all the values in the table are in (eV)

| Samples |                  | Before etching       |                       |                       |                       | After etching        |                       |                       |                       |
|---------|------------------|----------------------|-----------------------|-----------------------|-----------------------|----------------------|-----------------------|-----------------------|-----------------------|
|         |                  | TiO <sub>2</sub> NTs | TiON <sub>2</sub> NTs | TiON <sub>4</sub> NTs | TiON <sub>6</sub> NTs | TiO <sub>2</sub> NTs | TiON <sub>2</sub> NTs | TiON <sub>4</sub> NTs | TiON <sub>6</sub> NTs |
| Ti      | Ti               | ----                 | ----                  | ----                  | ----                  | ----                 | 454.4                 | 454.4                 | 454.4                 |
|         | Ti               | ----                 | ----                  | ----                  | ----                  | ----                 | 460.0                 | 460.0                 | 460.0                 |
|         | TiN              | ----                 | 455.5                 | 455.6                 | 455.8                 | ----                 | 455.7                 | 455.7                 | 455.7                 |
|         | TiN              | ----                 | 461.3                 | 461.4                 | 461.5                 | ----                 | 461.0                 | 461.2                 | 461.3                 |
|         | Ti-O-N           | ----                 | 457.2                 | 457.0                 | 456.9                 | ----                 | 457.2                 | 457.3                 | 457.4                 |
|         | Ti-O-N           | ----                 | 462.7                 | 462.6                 | 462.5                 | ----                 | 462.5                 | 462.5                 | 462.7                 |
|         | Ti-O             | 458.7                | 458.4                 | 458.4                 | 458.4                 | 458.7                | 458.7                 | 458.7                 | 458.8                 |
|         | Ti-O             | 464.4                | 464.3                 | 464.3                 | 464.3                 | 464.3                | 464.4                 | 464.4                 | 464.5                 |
| O       | Ti-O             | 530.2                | 530.5                 | 530.6                 | 530.9                 | 530.2                | 530.0                 | 530.0                 | 530.1                 |
|         | O-H              | 532.1                | ----                  | ----                  | ----                  | ----                 | ----                  | ----                  | ----                  |
|         | O-N              | ----                 | 531.5                 | 531.6                 | 531.7                 | ----                 | 530.9                 | 531.2                 | 531.3                 |
|         | O <sub>ads</sub> | 532.5                | 532.7                 | 532.7                 | 532.8                 | 532.5                | 532.4                 | 533.0                 | 533.0                 |
| N       | Ti-O-N           | ----                 | 396.0                 | 395.7                 | ----                  | ----                 | 396.3                 | 396.3                 | 396.1                 |
|         | TiN              | ----                 | 397.4                 | 397.8                 | 397.8                 | ----                 | 398.0                 | 397.6                 | 397.5                 |
|         | Ti-N-O           | ----                 | 399.0                 | 399.8                 | 399.1                 | ----                 | 399.9                 | 399.3                 | 399.1                 |
|         | NO               | ----                 | 401.5                 | 401.3                 | 400.5                 | ----                 | 402.1                 | 402.4                 | 401.9                 |
|         | NO <sub>x</sub>  | ----                 | 402.4                 | 402.7                 | 402.9                 | ----                 | 403.9                 | ----                  | ----                  |
|         | NO <sub>x</sub>  | ----                 | 404.7                 | 404.8                 | 405.1                 | ----                 | ----                  | ----                  | ----                  |

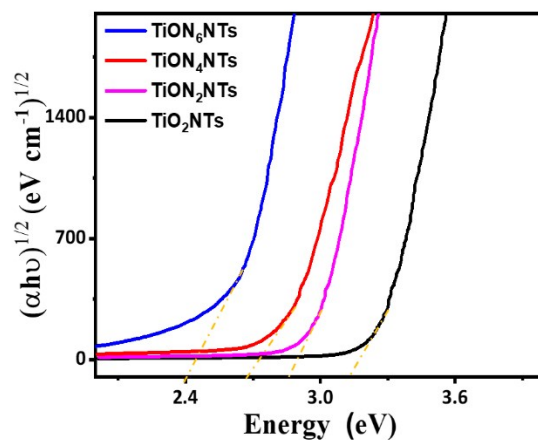

**Figure S2** Tauc plot of ammonia annealed  $\text{TiON}_6\text{NTs}$ ,  $\text{TiON}_4\text{NTs}$ , and  $\text{TiON}_2\text{NTs}$  relative to air annealed  $\text{TiO}_2\text{NTs}$ .

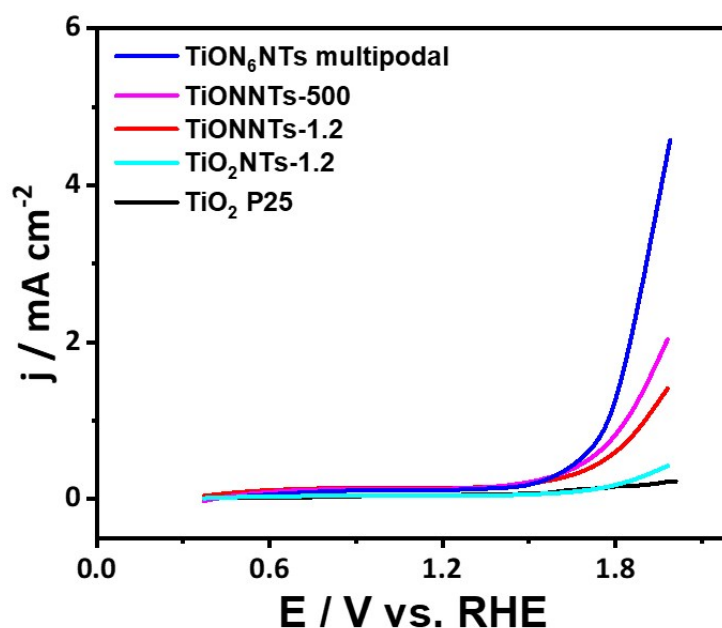

**Figure S2** LSV of water oxidation on different photocatalysts with different lengths and shapes in an aqueous solution of 0.1 M KOH at a scan rate of  $10 \text{ mV s}^{-1}$  at room temperature under light illumination.

$\text{TiON}_6\text{NTs}$  is multipodal (80 nm length),  $\text{TiONNTs-1.2}$  is ammonia annealed  $\text{TiO}_2\text{NTs}$  (1.2  $\mu\text{m}$  length),  $\text{TiONNTs-500}$  is ammonia annealed  $\text{TiO}_2\text{NTs}$  (500 nm length),  $\text{TiO}_2\text{NTs-1.2}$  is nitrogen-free (1.2  $\mu\text{m}$  length), and  $\text{TiO}_2$  is commercial  $\text{TiO}_2$  nanoparticles (spherical 5-8 nm).  $\text{TiON}_6\text{NTs}$ ,  $\text{TiONNTs-1.2}$ ,  $\text{TiONNTs-500}$ , and  $\text{TiO}_2\text{NTs-1.2}$ , were used as working electrode, while  $\text{TiO}_2$  nanoparticles were deposited on indium tin oxide substrate with the same area as other NTs foils.

TiONNTs-1.2 and TiO<sub>2</sub>NTs-1.2 were prepared using our previous reported method<sup>1</sup>. Meanwhile, the same method was used to fabricate TiONNTs-500 but with decreasing the anodic oxidation time to 80 min. TiONNTs-1.2 and TiONNTs-500 were annealed under ammonia for 6 h.

**Table S2** The donor densities band potential obtained from Mott-Schottky plots

|       |                                                                                         | TiO <sub>2</sub> NTs | TiON <sub>2</sub> NTs | TiON <sub>4</sub> NTs | TiON <sub>6</sub> NTs |
|-------|-----------------------------------------------------------------------------------------|----------------------|-----------------------|-----------------------|-----------------------|
| Light | $R_1$<br>( $\Omega \cdot \text{cm}^2$ )                                                 | 192.3                | 167.1                 | 128.1                 | 112.4                 |
|       | $\text{CPE}_1 Y_{o1} \times 10^{-6}$<br>( $\text{s}^n \text{ohm}^{-1} \text{cm}^{-2}$ ) | 1036                 | 1345                  | 2093                  | 2467                  |
|       | $n_1$                                                                                   | 0.874                | 0.743                 | 0.719                 | 0.667                 |
|       | $R_2$<br>( $\Omega \cdot \text{cm}^2$ )                                                 | 2115                 | 2012                  | 1423                  | 1264                  |
|       | $\text{CPE}_2 Y_{o2} \times 10^{-6}$<br>( $\text{s}^n \text{ohm}^{-1} \text{cm}^{-2}$ ) | 93.51                | 99.13                 | 157.2                 | 213.7                 |
|       | $n_2$                                                                                   | 0.613                | 0.597                 | 0.572                 | 0.556                 |

**Table S3** The donor densities band potential obtained from Mott-Schottky plots

|                       | $N_d / \text{cm}^{-3}$ | $E_{FB} / \text{V vs. RHE}$ |
|-----------------------|------------------------|-----------------------------|
| TiO <sub>2</sub> NTs  | 1.68E+19               | 0.89                        |
| TiON <sub>2</sub> NTs | 8.24E+18               | 1.16                        |
| TiON <sub>4</sub> NTs | 4.15E+18               | -1.57                       |
| TiON <sub>6</sub> NTs | 3.54E+18               | -1.94                       |

## References

1. K. Eid, K. A. Soliman, D. Abdulmalik, D. Mitoraj, M. H. Sleim, M. O. Liedke, H. A. El-Sayed, A. S. AlJaber, I. Y. Al-Qaradawi and O. M. Reyes, *Catal. Sci. Technol.*, 2020, **10**, 801-809.
